# Supplementary material for: A Prospective Population Pharmacokinetic Study on Morphine Metabolism in Cancer Patients
Source: Springer Nature journal article supplement (doi:10.1007/s40262-016-0471-7), 2016-11-05

**Fig. S2** Observed concentrations of morphine, M3G and M6G vs. time after first dose record (upper panel) and the same data with the x-axis truncated to 200 hours (lower panel)

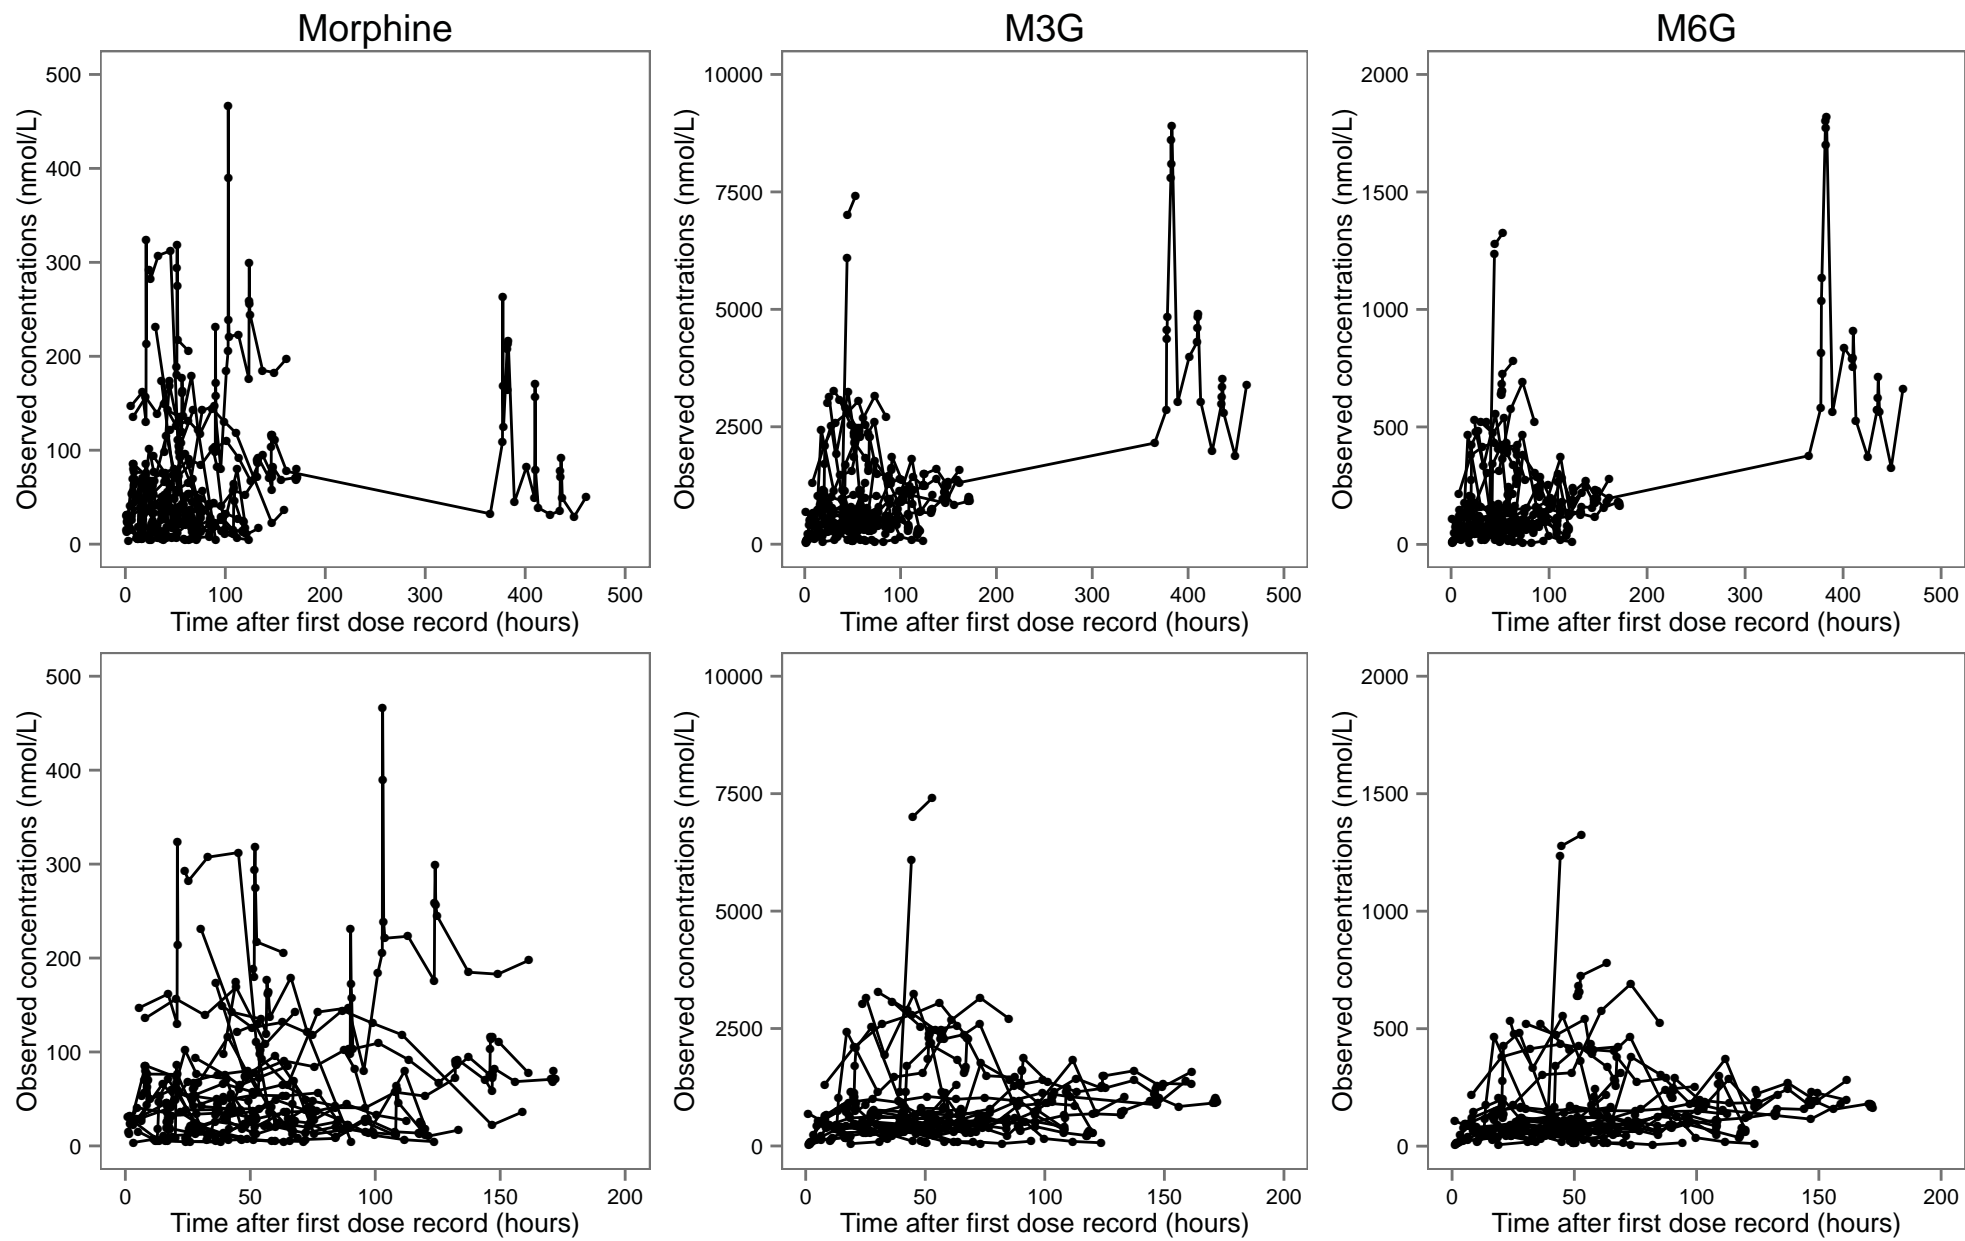

Supplement: MOESM3 [file 11022756]
